# Supplementary material
Source: PubMed Central journal article supplement (PMC6966930)
Supplement: blood895326-suppl1.pdf [file blood895326-suppl1.pdf]

## **Supplementary Methods**

### ***Western Blot***

The membrane was then blocked in either 5% non-fat dry milk or 5% BSA followed by incubation with primary antibodies at 4°C overnight. Antibodies for p-STAT5 (Abcam 32364), STAT5 (Cell Signaling 9358), p-JAK2 (Cell Signaling 3774), JAK2 (Cell Signaling 3230), p-STAT3 (Cell Signaling 9145), STAT3 (Cell Signaling 9139), tubulin (Cell Signaling 2144), ac-tubulin (sigma T6793), H3 (Abcam 1791), ac-H3 (Millipore 06-599), p-AURKB (Cell Signaling 2914), AURKA (Cell Signaling 14475), p21Waf1/Cip1 (Cell Signaling 2947), p-CDK1 (Cell Signaling 9111), CDK1 (Abcam 32384), Cyclin B1 (Cell Signaling 12231), p27 (Cell Signaling 3686), p-H3 (Cell Signaling 3377), HDAC6 (Millipore 07-732) and HDAC11 antibody (NBP2-16789, Novus Biological) at a 1:1000 dilution in 5% bovine serum albumin in TBST buffer were used. Horseradish peroxidase-conjugated secondary antibodies were from Thermo Scientific.

### ***Apoptosis analysis***

Cells were washed twice with annexin V binding buffer (BD Bioscience 556454), and stained with annexin V-APC (BioLegend 640920) for 15 min in the dark. DAPI (Invitrogen D3571) was added to stain dead cells before acquisition by a LSRII cytometer (BD Biosciences). Analysis was performed using FlowJo software version 10.0.8 (Tree Star).

### ***siRNA Silencing***

siRNA transfection was performed using Lonza Cell Line Nucleofector Kit V (Lonza

VCA-1003) on Amaxa Nucleofector 2b (Lonza) according to the manufacturer's instructions. HDAC6 siRNAs were purchased from Dharmacon (J-003499-05-0005 for siRNA#1 and J-003499-06-0005 for siRNA#2), as was the non-targeting control siRNA (Dharmacon D-001810-01-05).

***Preparation of lentivirus and HDAC11 knock down***

HEK293 cell line was used to obtain lentivirus from packaging plasmids and Mission HDAC11 shRNA vector (Clone ID: NM\_024827.3-364s21c1). Sequence: CCGGG CGCTA TCTTA ATGAG CTCAA CTCGA GTTGA GCTCA TTAAG ATAGC GCTTT TTG. Also, a Non-Target shRNA was used as a control plasmid.  $4 \times 10^6$  HEK 293 cells were seeded into 10 cm tissue culture plates in 10 ml of growth medium a day before transfection. Next day, 70-80% confluent cells were transfected with prescribed DNA concentrations using jet prime transfection reagent (POLYPLUS, Cat# 114-07) according to manufacturer's protocol and placed in 37°C degree CO<sub>2</sub> incubator. Fresh antibiotics free medium was added into transfected plates after 24 hours and incubated for additional 24 hours. Lentiviral supernatants were passed through a 0.45 µm low protein binding filter to remove cellular debris 48 hours after the start of transfection when the viral titers were generally highest. The shRNA lentiviruses were concentrated by ultracentrifugation (2 hours at 23,000 rpm) and re-suspended in 100uL of serum free media.

Total  $0.5 \times 10^6/100\text{uL}$  of *JAK2<sup>V617F</sup>*-expressing Ba/F3 cells were spininfected for 2 hours (1500 rpm) with polybrene and 20uL of virus titer in a 96 well plate. After spininfection cells

were diluted into 1mL of growth media and monitored for metabolic health every 24 hours post transduction using cell titer glow assay (CellTiter-Glo® Luminescent Cell Viability Assay, Promega, Cat# G7570) according to the manufacturer's protocol.

50  $\mu$ L of cells equilibrated at room temperature (control non-target (NT) shRNA and HDAC11 shRNA lentivirus transduced) were plated in a clear bottom black 96-multi well plate and mixed with an equal volume of cell titer glow mix (prepared by mixing cell titer glow buffer and lyophilized substrate according to manufacturer's instructions). Cell mix was lysed on a plate shaker for 2 minutes and incubated for another 10 minutes in the dark. The luminescence signal as a measure of intracellular ATP levels was recorded using standard luminometer.

A second constitutively expressed HDAC11 shRNA construct (TRCN0000330863) was also used in some experiments as indicated (SET-2 cells shown in Supplementary Fig. S3i) and JAK2 mutated Ba/F3 cells (Supplementary Fig. S3g-h). The transient knock down of HDAC11 expression is measured after 72- and 96-hours post lentivirus infection.

In SET2 cells, HDAC11 shRNA knockdown was performed using IPTG inducible shRNA vectors MISSION TRC2 pLKO.5-IPTG-3xLAc0 (TRCN0000199149 & TRCN0000330863) and compared to the control MISSION TRC2 pLKO.5-puro-IPTG-3xLAc0 (SHC202) (Sigma Aldrich, St. Louis, MO). Lentiviral particles were produced in HEK-293T cells with jetPRIME transfection reagent (Polyplus, Illkirch, France) and 3rd generation lentiviral packaging mixture (Applied Biological Materials Inc., Richmond, Canada) according to the

manufacturer's protocol. Transduction was performed at  $5 \times 10^7$  cells/mL for 2 h at 1500xg, room temperature (RT) in the presence of 0.6  $\mu$ g/ml polybrene (Merck Millipore, Billerica, MA). The shRNA lentivirus was concentrated by ultracentrifugation (2 hours at 23,000 rpm) and re-suspended in 100uL of serum free media. Total  $5 \times 10^5$ /100uL of cells were spininfected for 2 hours (1500 rpm) with polybrene and 20uL of virus in a 96 well plate. Selection of stable clones started 48 hours post transduction by the addition of 1-2  $\mu$ g/ml puromycin for 15-21 days. The stable shRNA expressing clones are induced with 300  $\mu$ M IPTG and total HDAC11 expression is measured after 72- or 96-hours post IPTG induction. In this assay, Celigo imaging was used to assess viability. Celigo Imaging Cytometer compatible clear bottom black 96 well plates were used for imaging cells (Greiner-655090) according to the manufacturer's instructions (Nexcelom). Cell numbers and viability measurements were taken by staining 50  $\mu$ L of cells with equal volumes of Acridine orange and Propidium Iodide (AOPI, Thermofisher, CS2-0106) solution in a 96 well plate as described in the vendor protocol. The stained cells are incubated for not more than 10 minutes and imaged in green (Acridine orange) and red (propidium iodide) channels to measure live and dead cells, respectively.

### ***Cell cycle analyses***

For cell cycle analysis, cells were first fixed in 70% ethanol overnight. The next day, cells were washed with PBS and suspended in DAPI/Triton X-100 staining solution (0.1% Triton X-100, 1ug/ml DAPI) and kept in dark for 1 hr before measured by a LSRII cytometer (BD

Biosciences,). Analysis was performed using ModFit LT software v4.1 (Verify Software House).

### ***Mouse bone marrow colony assays***

0.2 million mouse BM cells were suspended in 200- $\mu$ l RPMI, which was added to 3-ml Methocult medium (Stem Cell Technologies 03444) with or without cytokines (Stem Cell Technologies 03231) and vortexed for 15 sec. When bubbles disappeared 10 min later, Methocult medium was dispensed into culture dishes and incubated at 37°C and 5% CO<sub>2</sub>. Colonies were observed and counted after incubation for 7 days. Colonies were stained by 1mg/ml MTT overnight to take representative pictures.

### ***Human bone marrow colony assays***

Colony formation of primary human MPN cells was performed as described previously <sup>1</sup>. Briefly, mononuclear cells were isolated from peripheral blood obtained from Moffitt Cancer Center patients who were consented through the Moffitt Cancer Center Total Cancer Care protocol (MCC 14690/Liberty IRB #12.11.0023), with approval by the Moffitt Cancer Center Scientific Review committee. Colony formation was assessed by plating 0.2 million cells in duplicate in methylcellulose lacking erythropoietin (MethoCult™ #H4534; STEMCELL Technologies, Inc.). Primary samples were from patients with ET, PV or MF as indicated (Fig. 3C-D). All patients were *JAK2*<sup>V617F</sup> positive and none of the patients were on ruxolitinib at the time of sample acquisition.

### ***qRT-PCR analysis***

Total RNA was extracted using RNeasy Micro Kit (Qiagen), and converted into cDNA using iScript cDNA synthesis kit (Bio-Rad Laboratories) according to the manufacturer's instructions. cDNA was added to Taqman PCR mix (Life Technologies) in a 25- $\mu$ L final volume containing forward and reverse primers. Amplification cycles (n=40) were performed using 7900HT Real-time PCR System (Applied Biosystems). Primers were purchased from Life Technologies, Carlsbad, CA (*CDKN1A* Hs00427201\_CE), TATA-binding protein (*TBP* Mm00446971\_m1). Data were normalized to the reference gene *TBP* by a relative quantification using the  $\Delta\Delta$ Ct method.

#### **Analysis by LC-MS/MS Mass spectrometry**

The gel regions between 75 and 100 kDa for HSP90 immunoprecipitates from cells with HDAC6 siRNA knockdown and NTC siRNA were excised and treated with Tris(2-carboxy-ethyl) phosphine hydrochloride (TCEP) and iodoacetamide to reduce disulfide bonds and alkylate resulting from free cysteines. In-gel digestion using trypsin was performed overnight at 37 °C. After extraction and vacuum concentration, the tryptic peptides were analyzed using nanoflow liquid chromatography (RSLCnano, Thermo, San Jose, CA) coupled to an electrospray hybrid quadrupole Orbitrap mass spectrometer (Q Exactive Plus, Thermo, San Jose, CA) in a data-dependent manner for tandem mass spectrometry peptide sequencing. Peptides were first loaded onto a pre-column (5mm x 300  $\mu$ m ID packed with C18 reversed-phase resin, 5 $\mu$ m particle size, 100Å pore size) and washed for 8 minutes with aqueous 2% acetonitrile and 0.04% trifluoroacetic acid. The

trapped peptides were eluted onto a 75  $\mu\text{m}$  ID  $\times$  25 cm, 2  $\mu\text{m}$  Particle size, 100 $\text{\AA}$  pore size, C18 analytical column (Dionex, Sunnyvale, CA) using a 90-minute program at a flow rate of 300 nL/min of 5% solvent B for 8 minutes, 5 to 38.5% solvent B over 60 minutes, then 50% to 90% solvent B over 7 minutes and held at 90% for 5 minutes, followed by 90% to 5% solvent B in 1 minute and re-equilibrate for 10 minutes. Solvent A was composed of 98% ddH<sub>2</sub>O and 2% acetonitrile containing 0.1% FA. Solvent B was 90% acetonitrile and 10% ddH<sub>2</sub>O containing 0.1% FA. Sixteen tandem mass spectra were collected in a data-dependent manner following each survey scan. The relative quantification of peptides was calculated using MaxQuant (version 1.2.2.5). Peaks were searched against the Human database (20,151 sequences, released August 2015) with the Andromeda search engine<sup>2</sup>. The raw files were processed using select parameters including at least seven amino acids per peptide, as many as three missed cleavages to accommodate lysine acetylation sites, and a false discovery rate of 0.01 was selected for peptides and proteins. Methionine oxidation and peptide lysine and N-terminal acetylation were selected as variable modifications in protein quantification. Skyline version 3.7 was used for data evaluation using extracted ion chromatograms for HSP90 peptides<sup>3</sup>.

### **Gene set enrichment analysis for differentially-expressed genes**

For gene set enrichment analysis (GSEA), the GSEA java based desktop software was utilized in conjunction with a pre-ranked list of differentially expressed genes (2-fold change, FDR<0.05) between FT234 and control treated cells at 12 hours. Enrichment was

*Running Title: HDAC11 is a Therapeutic Vulnerability for MPN*

tested for in the C3 transcription factor collection and in the hallmark collection from the MSigDB (Broad Institute).



**Table S1. Flow cytometry instrument settings**

| Laser              |               |      | Detector<br>Spectral<br>Range (nm) | Optical Filters   |                   | Fluorochrome |
|--------------------|---------------|------|------------------------------------|-------------------|-------------------|--------------|
| Wavelength<br>(nm) | Power<br>(nm) | Type |                                    | Long Pass<br>(nm) | Band Pass<br>(nm) |              |
| 488                | 50            | DPSS | 685-735                            | 685               | 710/50            | PerCP-Cy5.5  |
|                    |               |      | 505-525                            | 505               | 515/20            | FITC, BB515  |
|                    |               |      | 483-493                            | --                | 488/10            | SSC          |
| 405                | 100           | DPSS | 755-810                            | 755               | 780/60            | BV785        |
|                    |               |      | 685-735                            | 670               | 710/50            | BV711        |
|                    |               |      | 650-670                            | 630               | 660/20            | BV650        |
|                    |               |      | 600-620                            | 590               | 610/20            | BV605        |
|                    |               |      | 570-607*                           | 570               | 585/42            | BV570        |
|                    |               |      | 505-525                            | 505               | 515/20            | BV510        |
|                    |               |      | 425-475                            | --                | 450/50            | BV421        |
|                    |               |      | 750-810                            | 740               | 780/60            | APC-H7/Cy7   |
| 640                | 100           | DPSS | 685-735                            | 685               | 710/50            | AF700        |
|                    |               |      | 663-677                            | --                | 670/14            | AF647, APC   |
|                    |               |      | 760-800                            | 740               | 780/40            | PE-Cy7       |
| 532                | 150           | DPSS | 690-735*                           | 690               | 710/50            | PE-Cy5.5     |
|                    |               |      | 640-680                            | 640               | 660/40            | PE-Cy5       |
|                    |               |      | 600-620                            | 595               | 610/20            | PE-CF594     |
|                    |               |      | 562-588                            | --                | 575/26            | PE           |
|                    |               |      |                                    |                   |                   |              |

*Running Title: HDAC11 is a Therapeutic Vulnerability for MPN*

|     |    |      |         |     |        |        |
|-----|----|------|---------|-----|--------|--------|
| 355 | 20 | DPSS | 790-850 | 770 | 820/60 | BUV805 |
|     |    |      | 500-530 | 450 | 515/30 | BUV496 |
|     |    |      | 365-393 | --  | 379/28 | BUV395 |

Instrument Configuration. This panel was developed and optimized for use on BDLSRII flow cytometry instrument with the listed optical configuration.

**Table S2. Flow cytometry antibodies and experimental design**

| Antibody                  |              |          |        |                |               | Staining Conditions |       |         |      |
|---------------------------|--------------|----------|--------|----------------|---------------|---------------------|-------|---------|------|
| Specificity               | Fluorochrome | Clone    | Vendor | Catalog Number | Vol/Test (μL) | Vol (μL)            | T (C) | t (min) | Step |
| <b>Mature Populations</b> |              |          |        |                |               |                     |       |         |      |
| CD45                      | PE/CF594     | 30-F11   | BD     | 562420         | 1             | 100                 | 4     | 60      | EC   |
| CD3                       | BV711        | 145-2C11 | BL     | 100349         | 1             | 100                 | 4     | 60      | EC   |
|                           | or FITC*     |          | BD     | 553061         |               |                     |       |         |      |
| B220                      | PerCP/Cy5.5  | RA3-6B2  | BL     | 103236         | 1             | 100                 | 4     | 60      | EC   |
| CD41                      | BV605        | MWReg30  | BL     | 133921         | 1             | 100                 | 4     | 60      | EC   |
| F4/80                     | BUV395       | T45-2342 | BD     | 565614         | 1             | 100                 | 4     | 60      | EC   |
| CD11b                     | APC          | M1/70    | BL     | 101212         | 1             | 100                 | 4     | 60      | EC   |
| Ter119                    | BV510        | TER-119  | BL     | 116237         | 1             | 100                 | 4     | 60      | EC   |
| CD71                      | PE/Cy7       | RI7217   | BL     | 113812         | 1             | 100                 | 4     | 60      | EC   |
| DAPI                      |              |          | TF     | D3571          | 1             | 100                 | 4     | 60      | EC   |
| <b>Lineage Cocktail</b>   |              |          |        |                |               |                     |       |         |      |
| CD3                       | Biotin       | 145-2C11 | BL     | 100304         | 1             | 100                 | 4     | 60      | EC   |
| CD4                       | Biotin       | RM4-5    | eBio   | 13-0042-85     | 1             | 100                 | 4     | 60      | EC   |
| CD8                       | Biotin       | 53-6.7   | BL     | 100704         | 1             | 100                 | 4     | 60      | EC   |
| CD11b                     | Biotin       | M1/70    | BD     | 553309         | 1             | 100                 | 4     | 60      | EC   |
| CD19                      | Biotin       | 6D5      | BL     | 115504         | 1             | 100                 | 4     | 60      | EC   |

Running Title: HDAC11 is a Therapeutic Vulnerability for MPN

|                                        |             |                  |       |                     |   |     |   |    |    |
|----------------------------------------|-------------|------------------|-------|---------------------|---|-----|---|----|----|
| CD127                                  | Biotin      | B12-1            | BD    | 55288               | 1 | 100 | 4 | 60 | EC |
| B220                                   | Biotin      | RA3-6B2          | BL    | 103204              | 1 | 100 | 4 | 60 | EC |
| Gr-1                                   | Biotin      | RB6-8C5          | BD    | 553125              | 1 | 100 | 4 | 60 | EC |
| Ter119                                 | Biotin      | TER-119          | BL    | 116204              | 1 | 100 | 4 | 60 | EC |
| <b>Stem and Progenitor Populations</b> |             |                  |       |                     |   |     |   |    |    |
| CD45                                   | PE/CF594    | 30-F11           | BD    | 562420              |   | 100 | 4 | 60 | EC |
| Streptavidin                           | APC-Cy7     |                  | BL    | 405208              | 1 | 100 | 4 | 60 | EC |
| c-Kit                                  | APC         | 2B8              | BL    | 105812              | 1 | 100 | 4 | 60 | EC |
| Sca-1                                  | PE-Cy7      | D7               | BL    | 108114              | 1 | 100 | 4 | 60 | EC |
| CD34                                   | PE          | RAM34            | BD    | 551387              | 4 | 100 | 4 | 60 | EC |
| CD135                                  | BV421       | A2F10            | BL    | 135314              | 1 | 100 | 4 | 60 | EC |
| CD150                                  | PerCP/Cy5.5 | TC15-12F<br>12.2 | BL    | 115922              | 1 | 100 | 4 | 60 | EC |
| CD 48                                  | BV 605      | HM48-1           | BL    | 103441              | 1 | 100 | 4 | 60 | EC |
| Ghost Dye<br>Viability Dye             | BV510       |                  | Tonbo | TB-13-087<br>0-T500 | 1 | 100 | 4 | 60 | EC |
| <b>Congenetic Markers</b>              |             |                  |       |                     |   |     |   |    |    |
| CD45.1                                 | PE          | A20              | Tonbo | TB-50-045<br>3-U100 | 1 | 100 | 4 | 60 | EC |
| CD45.2                                 | APC/Cy7     | 104              | Tonbo | TB-25-045<br>4-U100 | 1 | 100 | 4 | 60 | EC |

Commercial reagents used in the final panel (Abbreviations: BL, BioLegend; BD, Becton-Dickinson; eBio, Affymetrix eBioscience; Tonbo, Tonbo Biosciences; TF, Thermo Fischer Scientific; EC, extracellular staining. \*CD3 BV711 was used with samples that expressed GFP.

**Table S3. IC<sub>50</sub> values for compounds tested in specific cell lines.**

|                       | IC <sub>50</sub> (μM)         |                                |           |        |           |
|-----------------------|-------------------------------|--------------------------------|-----------|--------|-----------|
|                       | MPL <sup>W515L</sup><br>Ba/F3 | JAK2 <sup>V617F</sup><br>Ba/F3 | HEL92.1.7 | SET-2  | Figure    |
| Compound name         |                               |                                |           |        |           |
| Ruxolitinib           | 0.258                         | 0.053                          | 1.062     | 0.29   | Fig. S1a  |
| Panobinostat (LBH589) | 0.007                         | 0.02                           | 0.003     | 0.0024 | Fig. S1b  |
| Entinostat (MS275)    | 0.54                          | 1.3                            | 0.47      | 2.043  | Fig. S1e  |
| Nexturastat           | 0.2886                        | 0.1114                         | 0.2032    | 0.38   | Fig. 1a   |
| FT108                 | n/a                           | n/a                            | n/a       | n/a    | Fig. 1c   |
| FT234                 | 3.73                          | 2.341                          | 3.08      | 6.416  | Fig. 2a-d |
| FT743                 | 9.235                         | 3.165                          | 8.322     | 12.41  | Fig. 2a-d |
| FT895                 | 6.47                          | 3.002                          | 4.94      | 9.32   | Fig. 2a-d |
| FT383                 | 5.979                         | 3.947                          | 5.34      | 16.34  | Fig. 2a-d |
| FT650                 | n/a                           | n/a                            | n/a       | n/a    | Fig. 2a-d |
| FT422                 | n/a                           | n/a                            | n/a       | n/a    | Fig. 2a-d |

n/a=not applicable

Table S4. Pathway analyses (supplement for Figure 4)

| TRANSCRIPTION FACTORS    |                             |            |            |            |           |           |            |                                 |                                  |
|--------------------------|-----------------------------|------------|------------|------------|-----------|-----------|------------|---------------------------------|----------------------------------|
|                          | NAME                        | SIZE       | ES         | NES        | NOM p-val | FDR q-val | FWER p-val | RANK AT MAX                     | LEADING EDGE                     |
| Positive Enrichment      | V\$CREB_Q2                  | 25         | 0.66688585 | 2.3965702  | 0         | 0.0033716 | 0.003      | 57                              | tags=40%, list=9%, signal=42%    |
|                          | V\$ATF3_Q6                  | 17         | 0.71155024 | 2.3356655  | 0         | 0.0016858 | 0.003      | 61                              | tags=47%, list=10%, signal=51%   |
|                          | V\$CREB_Q4                  | 23         | 0.6386501  | 2.277921   | 0         | 0.0038223 | 0.009      | 57                              | tags=35%, list=9%, signal=37%    |
|                          | V\$CEBPDELTA_Q6             | 16         | 0.6797257  | 2.2102153  | 0         | 0.0062984 | 0.02       | 61                              | tags=38%, list=10%, signal=41%   |
|                          | YTATTTTNR_V\$MEF2_Q2        | 33         | 0.5606475  | 2.165139   | 0         | 0.0099945 | 0.041      | 62                              | tags=36%, list=10%, signal=38%   |
|                          | V\$CREB_Q2_Q1               | 17         | 0.6598964  | 2.147131   | 0.0012077 | 0.0100767 | 0.05       | 53                              | tags=41%, list=9%, signal=44%    |
|                          | TTANTCA_UNKNOOWN            | 32         | 0.5475376  | 2.1071916  | 0         | 0.0152895 | 0.086      | 123                             | tags=56%, list=20%, signal=67%   |
|                          | V\$ATF_Q1                   | 21         | 0.6115113  | 2.0984845  | 0         | 0.0143876 | 0.092      | 57                              | tags=33%, list=9%, signal=36%    |
|                          | V\$CREL_Q1                  | 17         | 0.62338    | 2.0770612  | 0         | 0.0157852 | 0.115      | 171                             | tags=76%, list=28%, signal=104%  |
|                          | V\$NFKAPPAB65_Q1            | 16         | 0.64712954 | 2.045359   | 0.0037129 | 0.0205368 | 0.165      | 171                             | tags=81%, list=28%, signal=110%  |
|                          | V\$CREB_Q1                  | 24         | 0.56775814 | 2.0375197  | 0.0023613 | 0.0202501 | 0.179      | 42                              | tags=25%, list=7%, signal=26%    |
|                          | TGACCTY_V\$ERR1_Q2          | 37         | 0.5199274  | 2.031554   | 0.0010977 | 0.0191442 | 0.183      | 58                              | tags=27%, list=10%, signal=28%   |
|                          | V\$CREBP1_Q2                | 18         | 0.5917336  | 2.010612   | 0.0036496 | 0.0209967 | 0.215      | 57                              | tags=39%, list=9%, signal=42%    |
|                          | CTAWWWATA_V\$RSRFC4_Q2      | 16         | 0.617348   | 2.000791   | 0.0063211 | 0.0214261 | 0.233      | 1                               | tags=13%, list=0%, signal=12%    |
|                          | V\$FREAC2_Q1                | 23         | 0.5522993  | 1.9536813  | 0.0034404 | 0.0309481 | 0.328      | 123                             | tags=57%, list=20%, signal=68%   |
|                          | V\$NFKB_Q6_Q1               | 15         | 0.6065788  | 1.9445336  | 0.003736  | 0.0308571 | 0.342      | 228                             | tags=93%, list=38%, signal=146%  |
|                          | GGATTA_V\$PITX2_Q2          | 20         | 0.5627635  | 1.9167831  | 0.0083933 | 0.0357364 | 0.404      | 118                             | tags=60%, list=20%, signal=72%   |
|                          | WGTTNNNNNAAA_UNKNOOWN       | 27         | 0.5162693  | 1.8969411  | 0.0011641 | 0.0406076 | 0.454      | 70                              | tags=41%, list=12%, signal=44%   |
|                          | YYCATTCAWW_UNKNOOWN         | 15         | 0.5922827  | 1.8750039  | 0.0075758 | 0.046466  | 0.513      | 42                              | tags=27%, list=7%, signal=28%    |
|                          | V\$TATA_C                   | 16         | 0.5757459  | 1.8627973  | 0.0103896 | 0.0483233 | 0.544      | 66                              | tags=31%, list=11%, signal=34%   |
|                          | RGAAANTTC_V\$HSF1_Q1        | 27         | 0.50229573 | 1.8572506  | 0.0113636 | 0.0485992 | 0.558      | 70                              | tags=30%, list=12%, signal=32%   |
|                          | TGANTCA_V\$AP1_C            | 53         | 0.4324205  | 1.8484384  | 0.007384  | 0.0499901 | 0.588      | 116                             | tags=40%, list=19%, signal=45%   |
|                          | GTGACGY_V\$E4F1_Q6          | 38         | 0.46265855 | 1.8313535  | 0.0097508 | 0.0531402 | 0.624      | 125                             | tags=39%, list=21%, signal=47%   |
|                          | TGAYRTCA_V\$ATF3_Q6         | 32         | 0.45983467 | 1.7822039  | 0.0134831 | 0.0733194 | 0.772      | 24                              | tags=16%, list=4%, signal=15%    |
| Negative Enrichment      | GCCATNTTG_V\$YY1_Q6         | 15         | -0.2050847 | -0.9369059 | 0.519802  | 0.5295463 | 0.999      | 485                             | tags=100%, list=80%, signal=492% |
| HALLMARKS                |                             |            |            |            |           |           |            |                                 |                                  |
|                          | NAME                        | SIZE       | ES         | NES        | NOM p-val | FDR q-val | FWER p-val | RANK AT MAX                     | LEADING EDGE                     |
| Positive Enrichment      | HALLMARK_TNFA_SIGNALING_VI  | 55         | 0.7161799  | 3.0556304  | 0         | 0         | 0          | 64                              | tags=51%, list=11%, signal=52%   |
|                          | HALLMARK_HYPOXIA            | 38         | 0.66722083 | 2.6609375  | 0         | 0         | 0          | 74                              | tags=50%, list=12%, signal=53%   |
|                          | HALLMARK_APOPTOSIS          | 22         | 0.7685602  | 2.6260316  | 0         | 0         | 0          | 38                              | tags=50%, list=6%, signal=51%    |
|                          | HALLMARK_P53_PATHWAY        | 21         | 0.6956952  | 2.4532094  | 0         | 0         | 0          | 74                              | tags=52%, list=12%, signal=58%   |
|                          | HALLMARK_EPITHELIAL_MESEN   | 16         | 0.7317256  | 2.39576    | 0         | 0         | 0          | 102                             | tags=69%, list=17%, signal=81%   |
|                          | HALLMARK_IL2_STAT5_SIGNALIN | 19         | 0.65740263 | 2.1897368  | 0         | 0.0011274 | 0.007      | 74                              | tags=53%, list=12%, signal=58%   |
|                          | HALLMARK_UV_RESPONSE_UP     | 20         | 0.6002329  | 1.9897634  | 0.001182  | 0.0048313 | 0.036      | 57                              | tags=35%, list=9%, signal=37%    |
|                          | HALLMARK_INFLAMMATORY_RE:   | 22         | 0.5392168  | 1.8448006  | 0.0094229 | 0.0157697 | 0.13       | 89                              | tags=45%, list=15%, signal=51%   |
|                          | HALLMARK_KRAS_SIGNALING_U   | 17         | 0.48430178 | 1.5754782  | 0.0702179 | 0.0756174 | 0.541      | 131                             | tags=41%, list=22%, signal=51%   |
|                          | HALLMARK_MTORC1_SIGNALING   | 22         | 0.38139647 | 1.3793769  | 0.1408284 | 0.1642551 | 0.845      | 106                             | tags=36%, list=18%, signal=42%   |
| HALLMARK_HEME_METABOLISM | 17                          | 0.41349268 | 1.3533674  | 0.1766201  | 0.163384  | 0.875     | 271        | tags=76%, list=45%, signal=135% |                                  |
| Negative Enrichment      | HALLMARK_G2M_CHECKPOINT     | 29         | -0.6810808 | -4.0975122 | 0         | 0         | 0          | 111                             | tags=83%, list=18%, signal=96%   |
|                          | HALLMARK_E2F_TARGETS        | 23         | -0.6219793 | -3.490275  | 0         | 0         | 0          | 117                             | tags=83%, list=19%, signal=99%   |
|                          | HALLMARK_GLYCOLYSIS         | 17         | -0.2479247 | -1.2044097 | 0.2       | 0.2139199 | 0.37       | 35                              | tags=29%, list=6%, signal=30%    |

SUPPLEMENTARY FIGURES

Figure S1

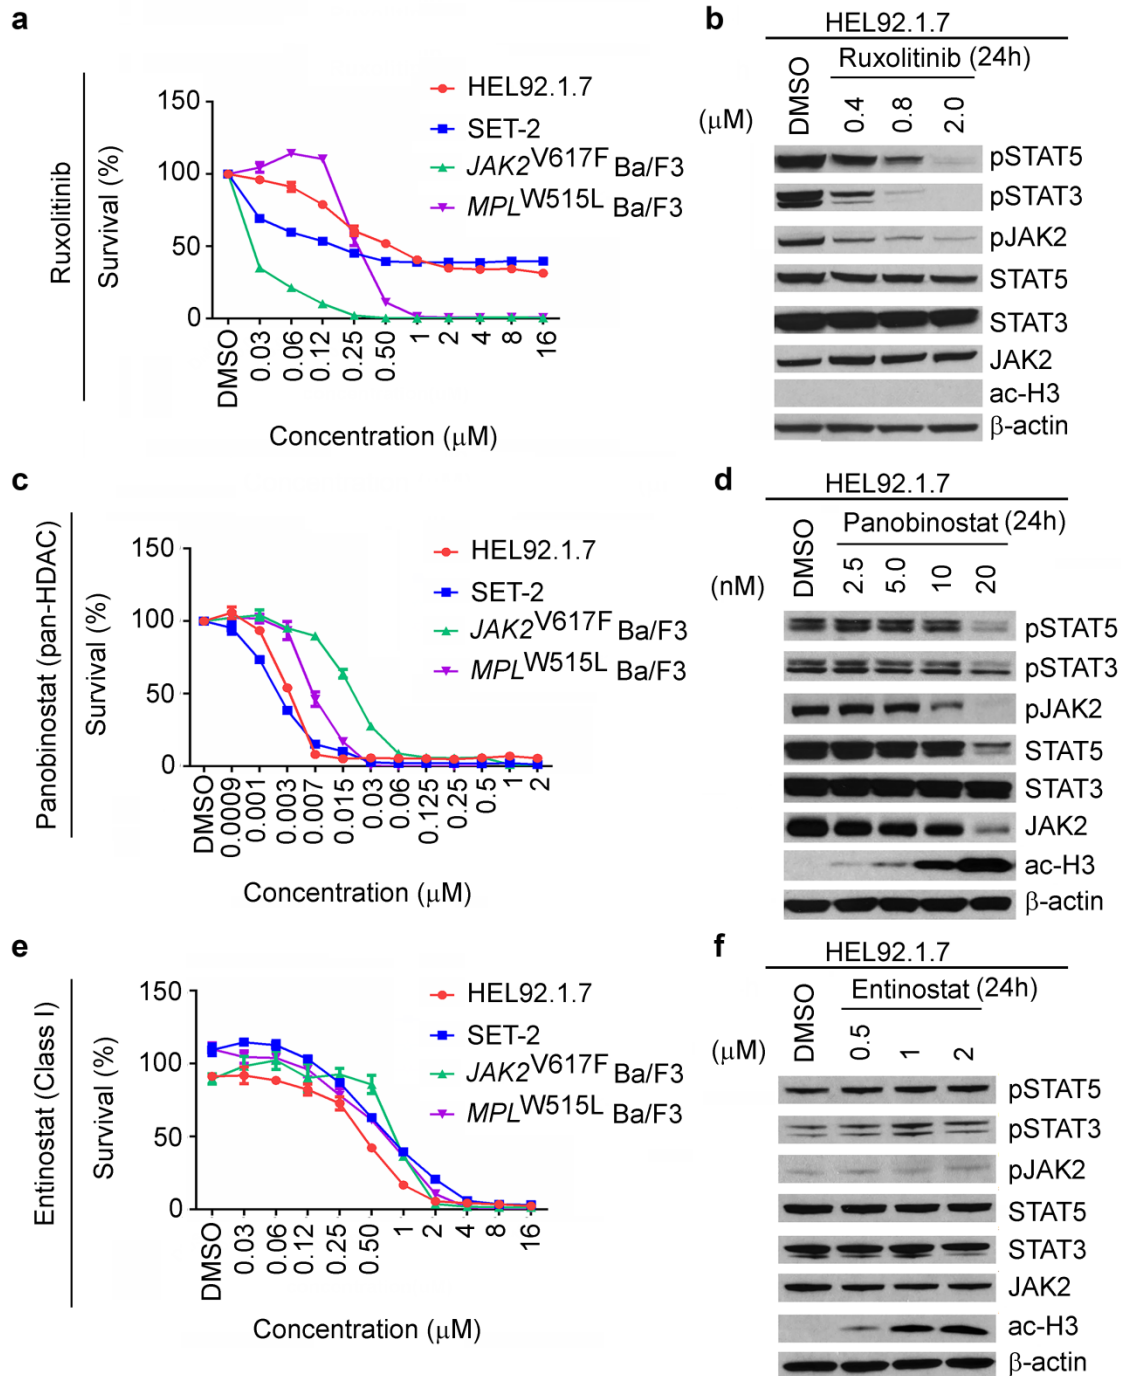

Supplementary Fig. S1 (Relevant to data shown in Fig. 1). Pan-HDAC inhibitors and class I HDAC

*Running Title: HDAC11 is a Therapeutic Vulnerability for MPN*

inhibitors suppress proliferation of human- and mouse MPN cell lines. **(a-f)**, HEL92.1.7 and SET-2 (human) as well as  $JAK2^{V617F}$  and  $MPL^{W515L}$ -transduced mouse Ba/F3 cells were treated with increasing doses of Ruxolitinib **(a-b)**, Panobinostat **(c-d)**, or Entinostat **(e-f)** for 48 hrs. Cell survival was measured by CCK8 assay and western blot analysis of the indicated signaling proteins was determined after 24 hrs of treatment in HEL92.1.7 cells. Ac=acetylated proteins; pSTAT5, pSTAT3, pJAK2= phosphorylated proteins. IC<sub>50</sub> data provided in Table S3.



Figure S2

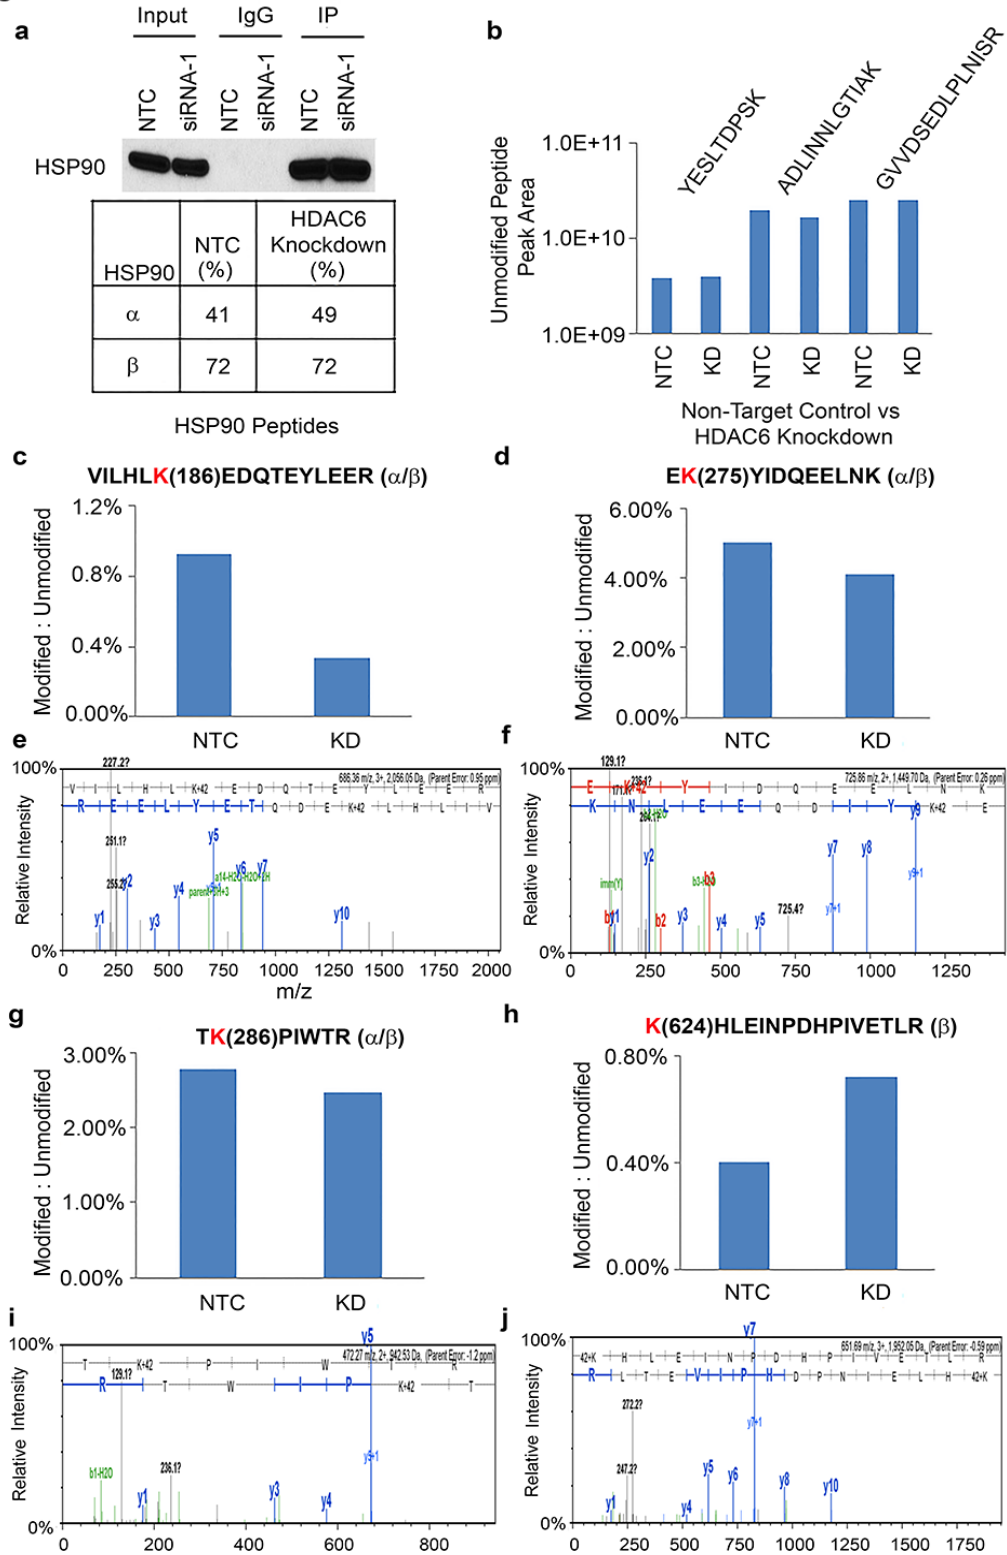

**Supplementary Fig. S2 LC-MS/MS Analysis of HSP90 Acetylation in Control and HDAC6**

**Knockdown Cells.** HSP90 was immunoprecipitated from HEL cells treated with non-targeted control (NTC) siRNA and HDAC6 siRNA. **(a)** The immunoprecipitated lysates were blotted against  $\alpha$ -HSP90 antibody then subjected to liquid chromatography/tandem mass spectrometry. Sequence coverage (%) of HSP 90- $\alpha$  and  $\beta$  in NTC and HDAC6 knockdown (KD) samples are shown. **(b)** Peak area for three unmodified peptides identified in both HSP90- $\alpha$  and  $\beta$  from NTC and HDAC6 knockdown. No significant changes were observed in the unmodified peptides between NTC and HDAC6 KD, therefore the changes observed in the acetyl modified peptides are significant. **(c, d and g)** Percentage of acetyl modified to unmodified peptides identified in HSP 90- $\alpha$  and  $\beta$  and (h) an acetyl modified peptide identified in only HSP 90- $\beta$ . **(e, f, i and j)** Spectra of acetyl modified peptides from HSP 90- $\alpha$  and  $\beta$  in NTC and HDAC6 knockdown samples. Peptides shown in **(e, f and i)** were identified in both HSP 90- $\alpha$  and  $\beta$  and shown in **(j)** was identified in only HSP90- $\beta$ .

Figure S3

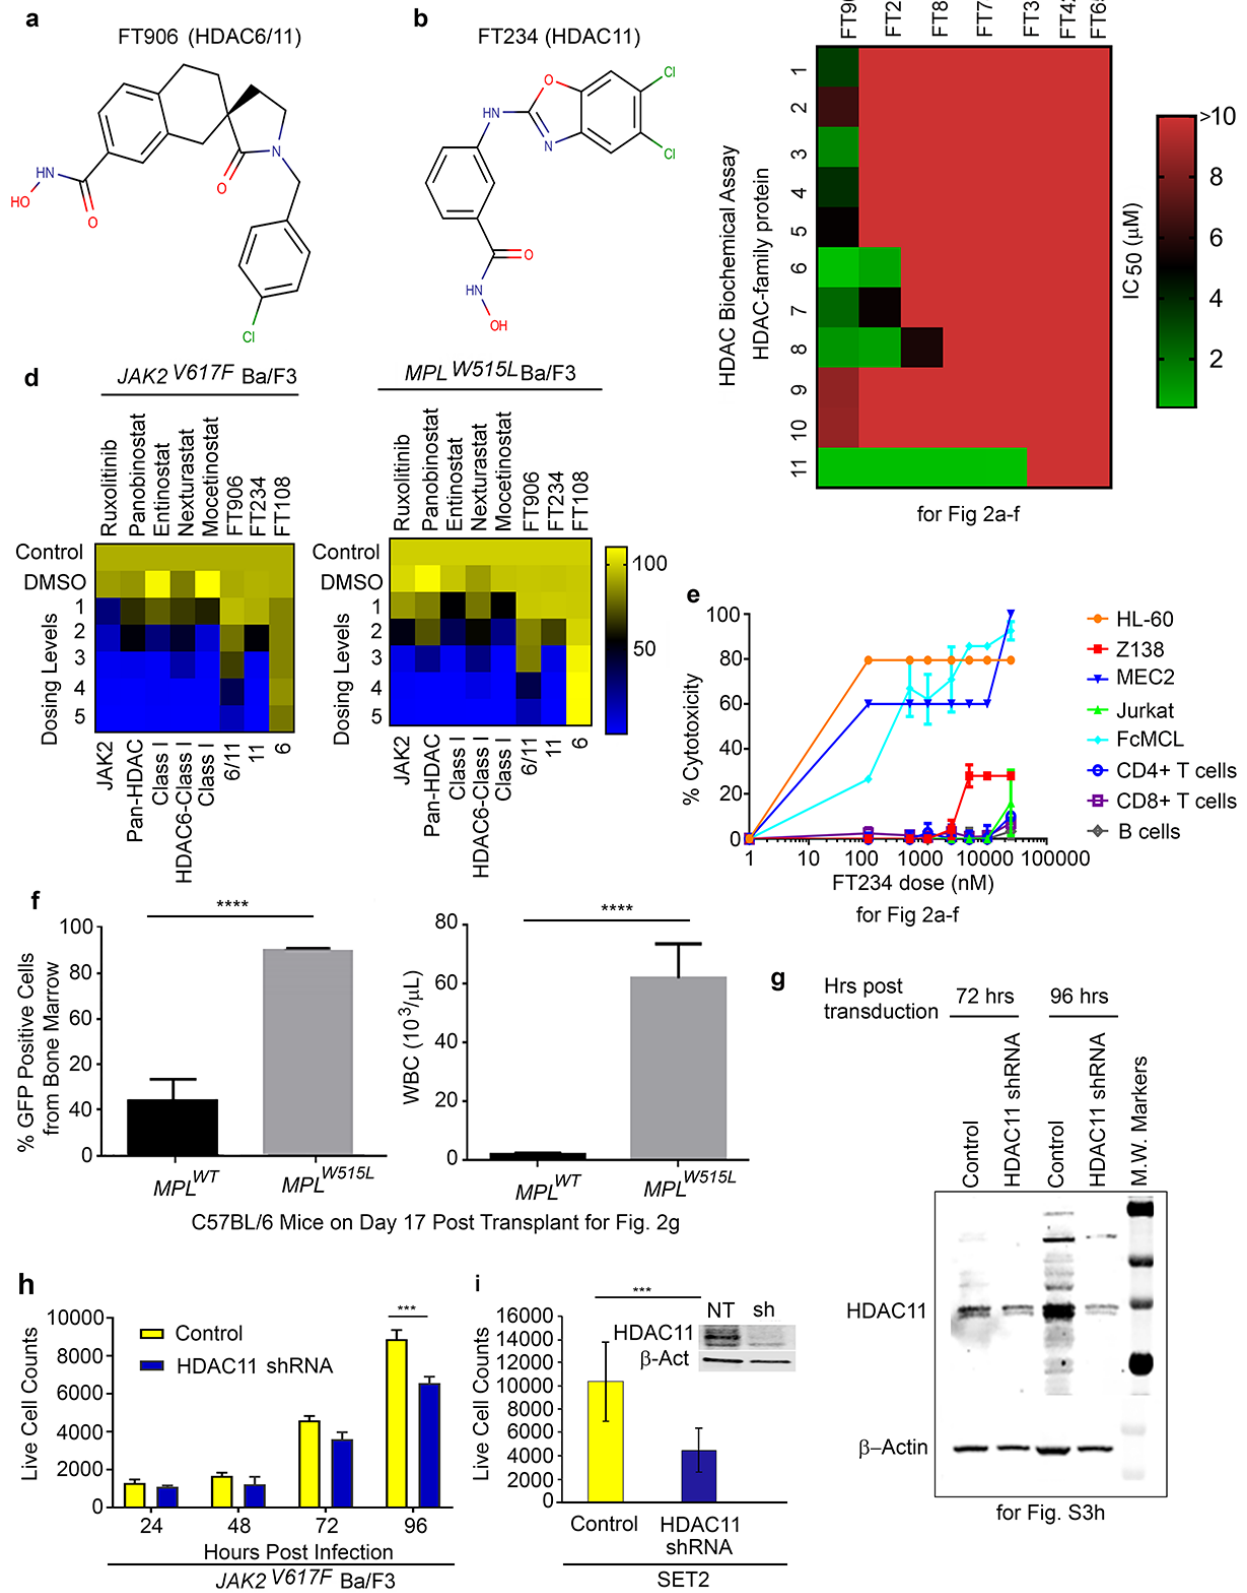

**Supplementary Fig. S3 (Relevant to data shown in Fig. 2).** HDAC inhibitors show differential activities in MPN cell lines. **(a)** Structure of FT906 and, **(b)** FT234. **(c)** IC<sub>50</sub> concentrations of the HDAC inhibitors in suppressing each of the indicated HDACs were determined by an enzymatic assay. Color bar indicates doses ranging from 0  $\mu$ M (green) to >10  $\mu$ M (red). **(d)** *JAK2*<sup>V617F</sup> and *MPL*<sup>W515L</sup> Ba/F3 cells treated with the indicated HDAC inhibitors at five increasing doses for 48 hr, after which CCK8 assay were conducted to assess survival. Color bar indicates survival rate ranging from 0 (blue) to 100% (yellow) relative to DMSO. **(e)** % cytotoxicity of several cell lines as named along with purified human T cells and B cells. IC<sub>50</sub>s for these experiments were not valid after calculation but showed distinct differences in sensitivity in at least three independent experiments. **(f)** % GFP positive BM cells and WBC on day 17 post-transplant with *MPL*<sup>WT</sup> or *MPL*<sup>W515L</sup>-transduced bone marrow. Experiment provided as supporting data for Fig. 2g. **(g)** Western blot analysis for HDAC11 and  $\beta$ -actin for cells treated with Non-target control (Control) or HDAC11 shRNA 72 or 96 hours after viral transduction. Cellular Viability using Cell titre glo as well as Acridine orange is measured in **(h)** mouse Ba/F3 *JAK2*<sup>V617F</sup> and **(i)** human SET2 cells. The achieved impact on HDAC11 protein expression with transient HDAC11 knock down in SET2 cells. Statistical analysis performed using two-tailed unpaired t-test. \*\*\*\* p <0.0001.

Figure S4

a

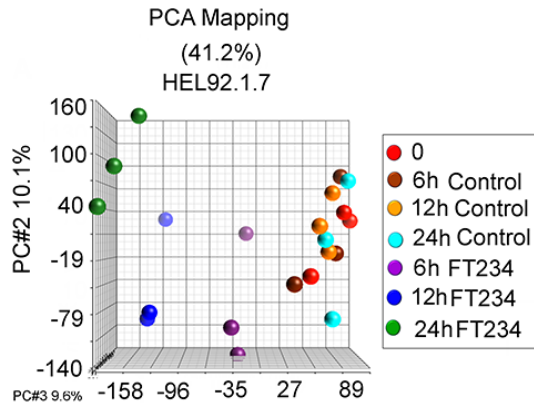

c

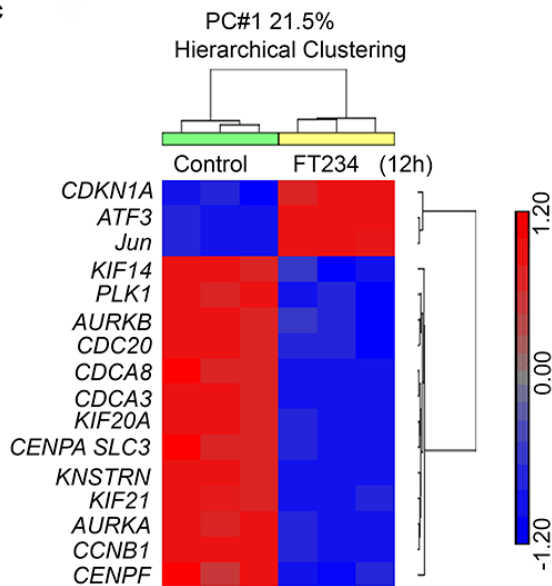

b

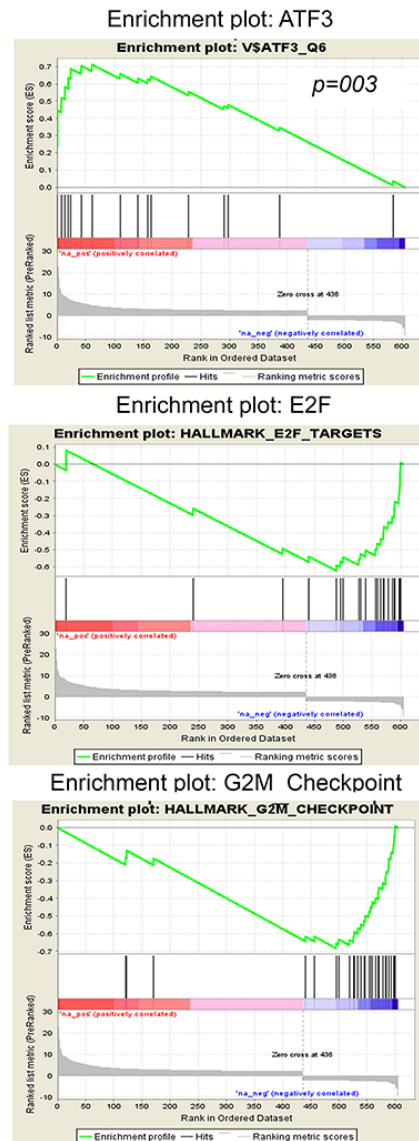

d

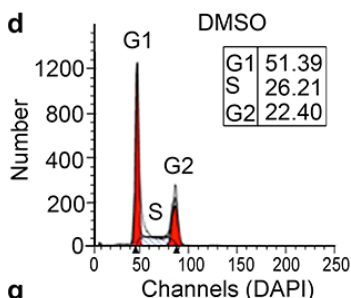

e

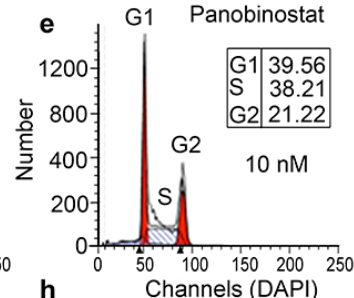

f

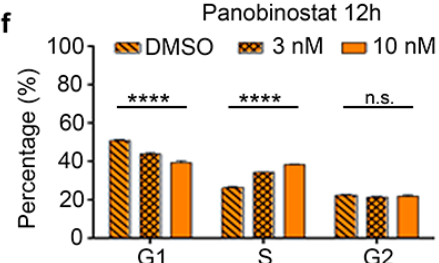

g

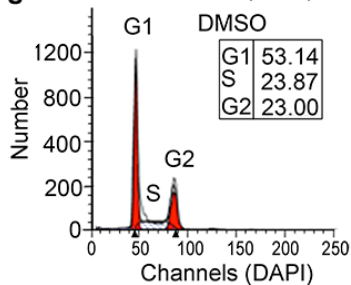

h

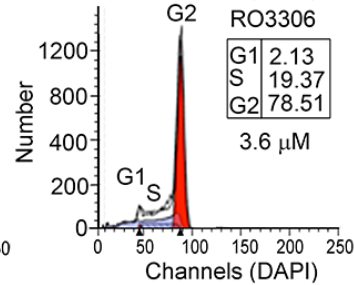

i

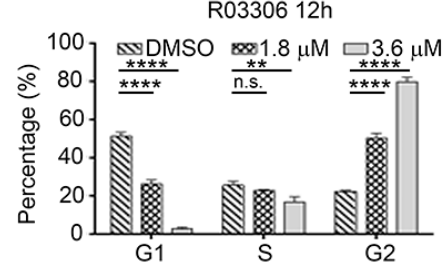

**Supplementary Fig. S4 (Relevant to data shown in Fig. 4).** Microarray analysis was conducted on HEL92.1.7 cells treated with 8  $\mu$ M of the HDAC11 inhibitor FT234 or the inactive compound FT650 for 6, 12 and 24 hr, followed by total RNA extraction using the RNeasy Micro Kit (Qiagen). 100 ng of total RNA was converted into cDNA and amplified and biotin-labeled using the Ambion Message Amp Premier Kit according to manufacturer's protocol (ThermoFisher Scientific, Waltham, MA). Hybridization, staining, and scanning of the Human Genome U133 Plus 2.0 Arrays (Affymetrix, Santa Clara, CA) was performed as outlined in the Affymetrix technical manual as detailed previously<sup>4</sup>. Scanned output files were visually inspected for hybridization artifacts and then analyzed using Affymetrix Expression Console v 1.4.1 utilizing the MAS 5.0 algorithm. Principle Component Analysis and unsupervised hierarchical clustering were performed. Statistical analysis was performed using two-way ANOVA. Gene lists with 2-fold differential expression and false discovery rate (FDR)  $\leq 0.05$  between the control and HDAC11 inhibitor-treated cells were compared. Gene Ontology (GO) analysis was performed on genes differentially expressed in HDAC11 inhibitor-treated cells using MetaCore GeneGo data analysis tool (Clarivate Analytics). The microarray data have been deposited to the Gene Expression Omnibus database under accession number GSE81725. HDAC11 inhibitor-induced changes in transcription and cell cycle profile of MPN cells. **(a)** HEL92.1.7 cells were treated with an HDAC11 selective inhibitor FT234 or inactive control FT650 for 6h, 12h and 24h, following which RNA was extracted for microarray analysis. Quality and reliability of the microarray data were evaluated by principal component analysis (PCA). **(b)** Microarray data were analyzed using

Partek software, showing differentially expressed genes between FT234-treated cells and control compound treated cells. Differentially-expressed genes induced by FT234 treatment were subjected to gene set enrichment analysis (GSEA). Plots indicate the maximum enrichment score (ES), ranked list metric, and the leading-edge subset. Scores of positively and negatively correlated genes in each pathway are indicated. Raw output files provided in Supplementary Table S4. **(c)** Heatmap of differentially expressed cell cycle regulated genes. **(d-i)** Cell cycle analysis of HEL92.1.7 MPN cells treated. Cells treated with DMSO **(d)** or Panobinostat (10 nM) **(e)** with data summarized for 3 and 10 nM in **(f)**. Cell cycle analysis plots of DMSO-treated cells **(g)** compared to the CDK1 inhibitor RO3306 at 3.6  $\mu$ M **(h)** and summarized for two doses 1.8 and 3.6  $\mu$ M as indicated for 12 hrs **(i)**. Data analyzed using ModFit LT software indicate percentage of cells in G1, S, and G2 phases of the cell cycle. Multiple t-test (compared to DMSO in each group) was performed for statistical analysis, non-significant = n.s., \*\*p< 0.01, and \*\*\*\* p<0.0001

Figure S5

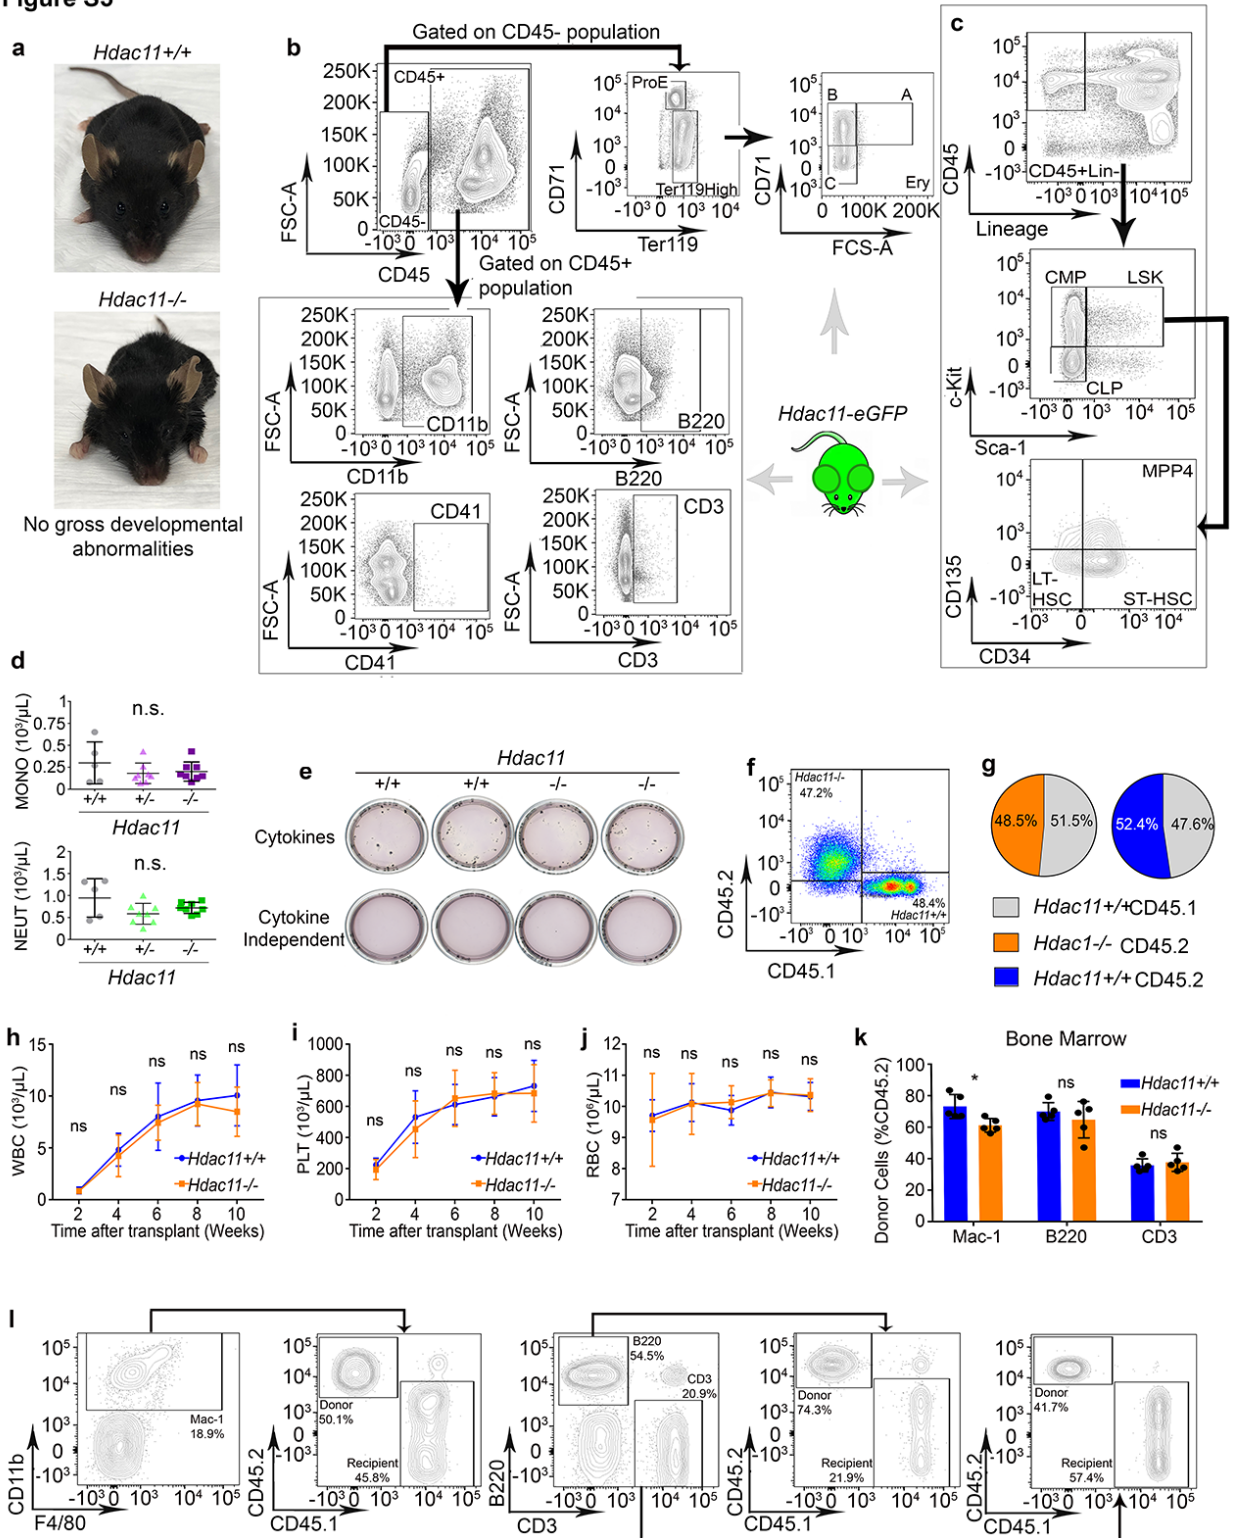



**Supplementary Fig. S5 (Relevant to data shown in Figure 5).** HDAC11 is expressed in mouse bone marrow cell subsets and *Hdac11* loss does not interfere with normal hematopoiesis. **(a)** *Hdac11*<sup>-/-</sup> mice exhibit no gross physical or developmental abnormalities compared to *Hdac11*<sup>+/+</sup> mice. **(b-c)** Bone marrow was harvested from *Hdac11-eGfp* mice (n=4) and *Hdac11* expression (GFP<sup>+</sup> cells) in mature **(b)**, stem **(c)**, and progenitor **(c)** populations was analyzed via flow cytometry. **(d)** Monocyte (MONO) and neutrophil (NEUT) counts of *Hdac11*<sup>+/+</sup> (n=5) (n.s.), *Hdac11*<sup>+/-</sup> (n=9), and *Hdac11*<sup>-/-</sup> (n=9) mice (eight weeks old) are shown from these experimental groups. No significant differences were observed using an ANOVA followed by Tukey's multiple comparison with p-value <0.05. **(e)** *Hdac11*<sup>+/+</sup> (n=2) and *Hdac11*<sup>-/-</sup> (n=2) whole bone marrow cells were cultured in cytokine-supplemented and cytokine-free methylcellulose medium. Colony numbers after 7 days in culture. Data represents one of two independent experiments. **(f-l)** Bone marrow cells (1×10<sup>6</sup>) from CD45.2 *Hdac11*<sup>+/+</sup> (n=4) or *Hdac11*<sup>-/-</sup> (n=4) mice were transplanted into lethally irradiated recipient mice (n=15 recipients/genotype) along with CD45.1 (1×10<sup>6</sup>) recipient bone marrow cells. **(f-g)** Donor (CD45.2<sup>+</sup>) and recipient (CD45.1<sup>+</sup>) cells were mixed in a 1:1 ratio and the percentage of each in the injection was determined by flow cytometry. **(h-j)** White blood cells **(h)**, platelets **(i)**, and red blood cells **(j)** were evaluated for ten weeks after transplantation. **(k)** Donor cell reconstitution in the myeloid (Mac-1<sup>+</sup>), B (B220<sup>+</sup>), and T (CD3<sup>+</sup>) cell lineages in the bone marrow was analyzed via flow cytometry. Statistical analysis was performed using multiple two-tailed unpaired t-test. \*\*\*\* p<0.0001, \*\*\* p<0.001, \*\* p<0.01, \*p<0.05. **(l)** Gating Strategy to evaluate donor cell engraftment in

*Running Title: HDAC11 is a Therapeutic Vulnerability for MPN*

peripheral blood. After excluding debris, doublets, and dead cells, Mac-1, B220, or CD3 populations were gated on, and donor and recipient populations were distinguished by CD45.2 and CD45.1, respectively. Statistical analysis performed using multiple two-tailed unpaired t-test. \*\*\*\* $p < 0.0001$ , \*\*\*  $p < 0.001$ , \*\* $p < 0.01$ , \* $p < 0.05$ .

Figure S6

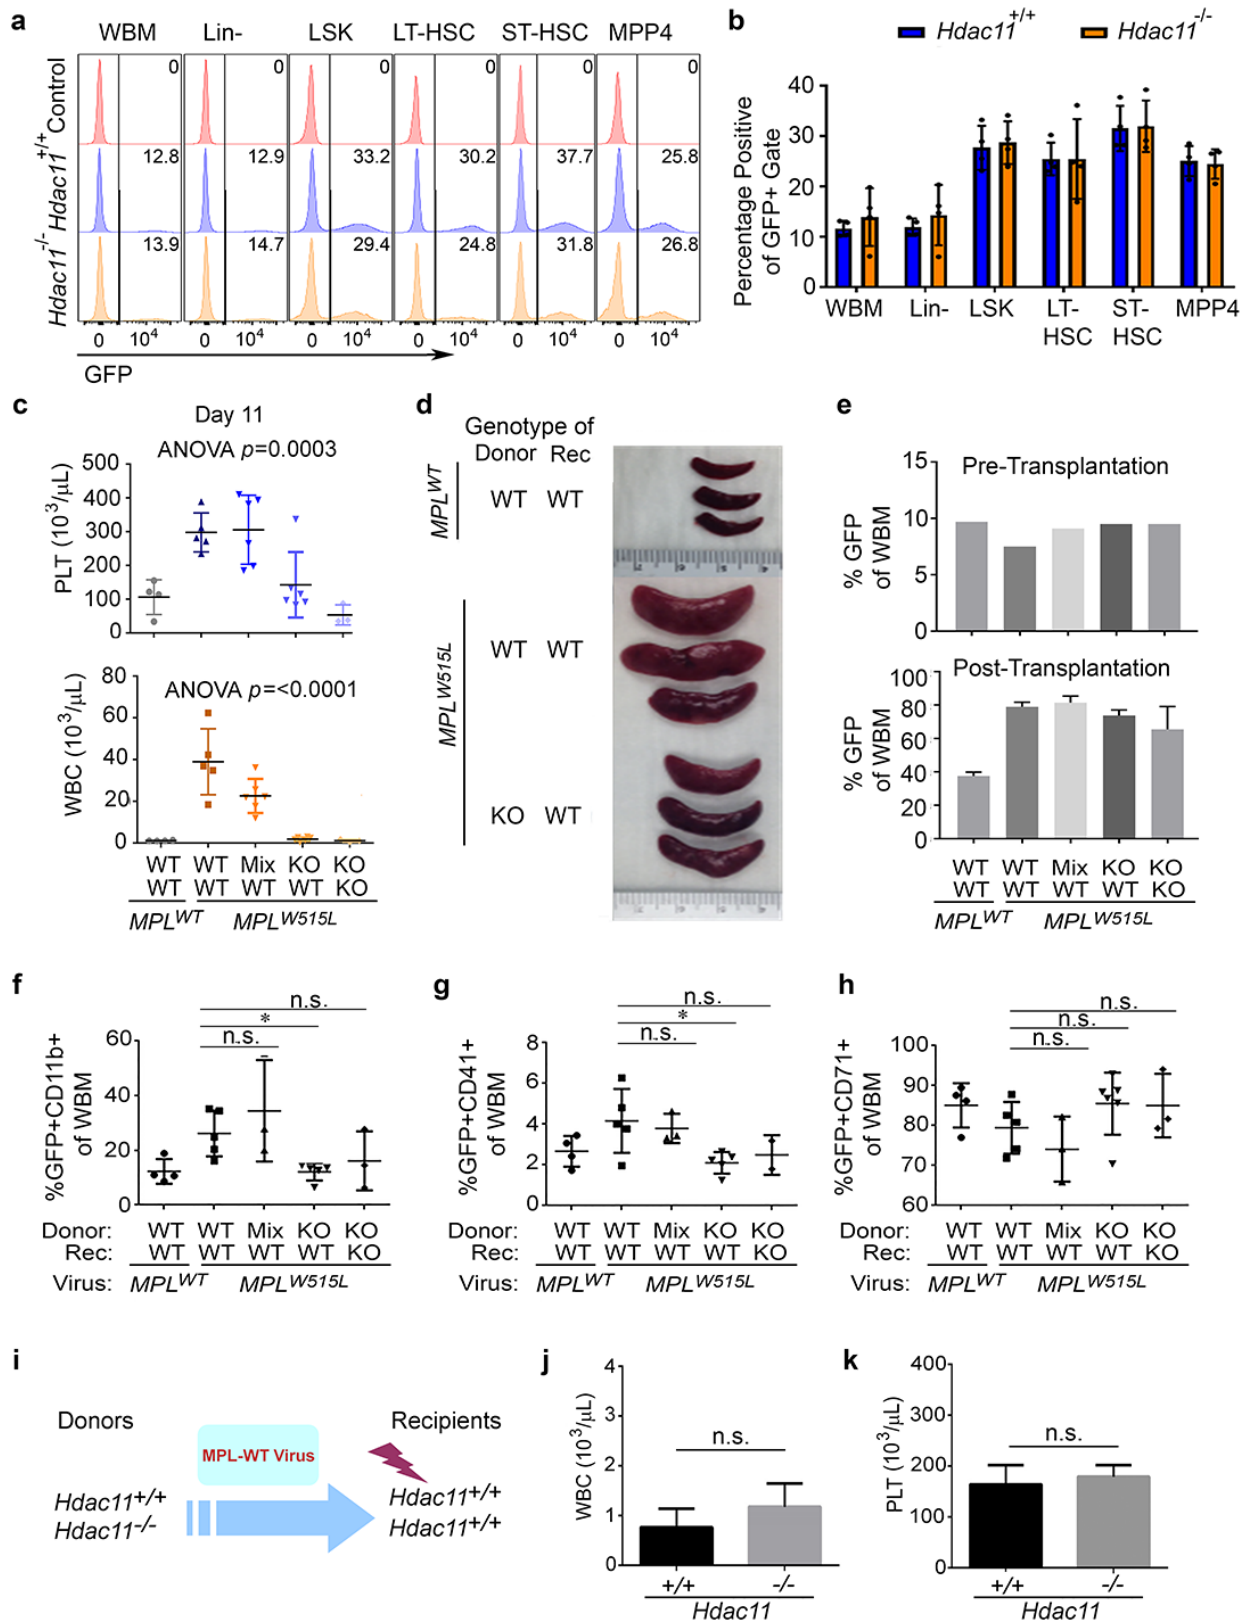

**Supplementary Fig. S6** Chimeric transplantation with *Hdac11*<sup>-/-</sup> donors attenuates *MPL*<sup>W515L</sup>-induced disease (Relevant to data shown in Figure 7). **(a-b)** Wild-type (WT, *Hdac*<sup>+/+</sup>) and *Hdac11*<sup>-/-</sup> bone marrow was infected with *Gfg-MPL*<sup>W515L</sup> recombinant virus. **(a)** Histograms of % GFP positive cells by genotype in WBM (whole bone marrow), Lin<sup>-</sup> cells, LSK, LT-HSC, ST-HSC and MPP4 from one mouse (percent positive indicated compared to non-transformed cells used for control). **(b)** Summary of data of four biological replicates from one independent experiment repeated three times (4x total) with similar results observed. **(c-h)** Recipients were transplanted with *MPL*<sup>WT</sup>- or *MPL*<sup>W515L</sup>-expressing BM, or with a 1:1 mixture *MPL*<sup>W515L</sup>-expressing *Hdac11*<sup>+/+</sup> and *Hdac11*<sup>-/-</sup> BM donors. *Hdac11*<sup>-/-</sup> recipients also received *MPL*<sup>W515L</sup>-transduced *Hdac11*<sup>-/-</sup> bone marrow to assess potential effects of *Hdac11* deficiency on the bone marrow niche. **(c)** Disease-progression was measured on day 11 via PLT and WBC counts. **(d)** Spleen size and **(e)** Transduction efficient was determined by GFP expression via flow cytometry prior to injection (pre-transplantation) and at the endpoint on day 20 (post-transplantation). **(f-h)** Twenty days after transplant all 5 transplanted groups were examined for the percentage of mature populations in whole bone marrow (WBM) including GFP+CD11b+ **(f)**, GFP+CD41+ **(g)**, and GFP+CD71+ **(h)** to assess HDAC11's role in MPN (after gating on live cells). Statistical analysis is shown \*p=0.05. Data represents the percentage of cells on day 20. **(i)** Schema for matched transplantation of *MPL*<sup>WT</sup> virus into *Hdac11*<sup>+/+</sup> and *Hdac11*<sup>-/-</sup> for reconstitution of normal hematopoietic cells white blood cell counts (WBC) **(j)** and platelet counts (Plts) **(k)** on day 38.

Figure S7

For Figure 7i-j

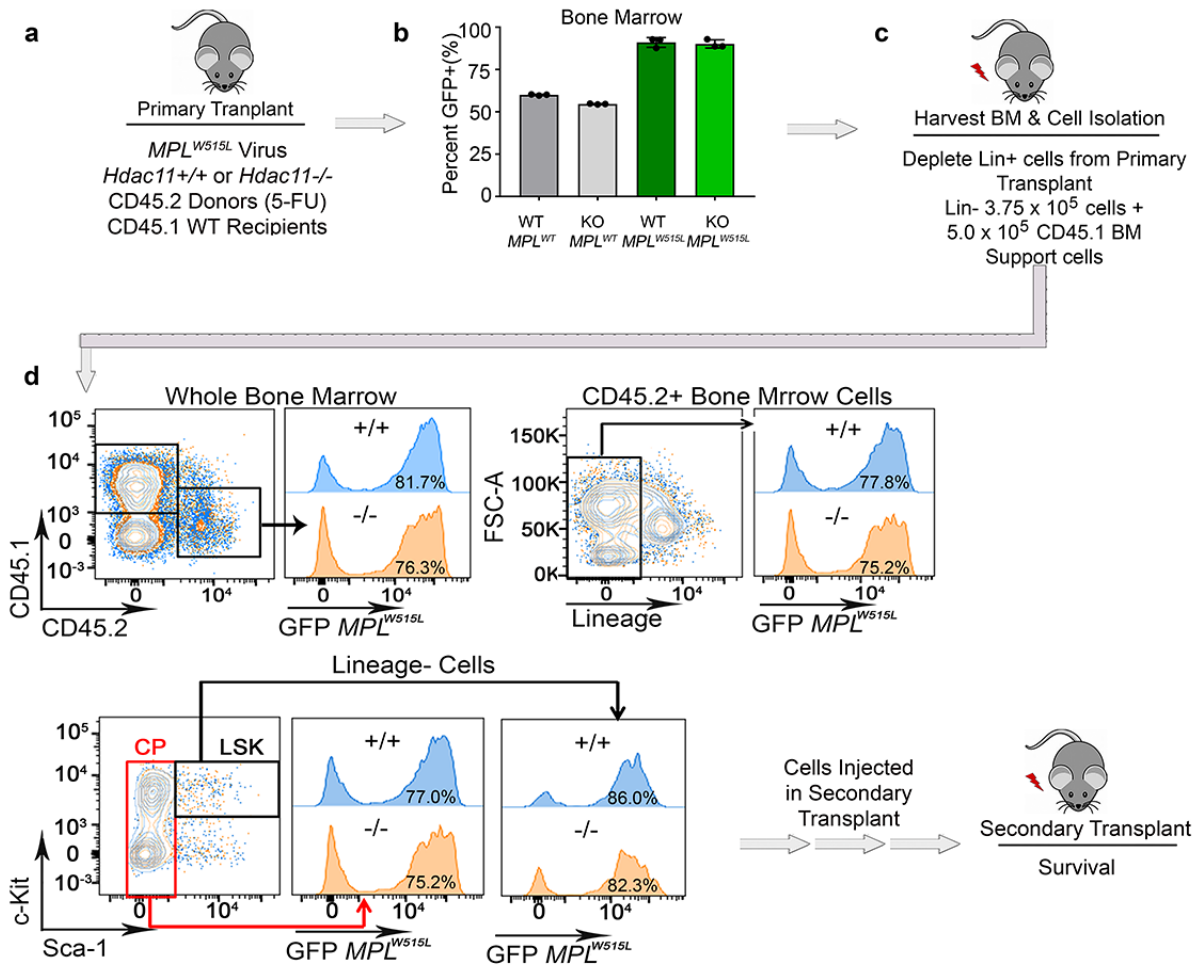

**Supplementary Fig. S7. Relates to data shown in Fig. 7h.** *Hdac11* deficiency maintains its ability to improve survival in secondary transplantation of *MPL<sup>W515L</sup>*. (a) *Hdac11<sup>+/+</sup>MPL<sup>WT</sup>*, *Hdac11<sup>-/-</sup>MPL<sup>WT</sup>*, *Hdac11<sup>+/+</sup>MPL<sup>W515L</sup>* and *Hdac11<sup>-/-</sup>MPL<sup>W515L</sup>* bone marrow cells were transplanted into lethally irradiated recipients (n=10 per group). (b) Disease progression was determined by GFP expression in the bone marrow. Statistical analysis performed using two-tailed unpaired t test. \*\*\*\* P < 0.0001, \*\*\* P < 0.001, \*\* P < 0.01, \*P < 0.05. (c) After diseased had progressed to similar levels, lineage negative bone marrow cells from *Hdac11<sup>+/+</sup>MPL<sup>W515L</sup>*

*Running Title: HDAC11 is a Therapeutic Vulnerability for MPN*

and *Hdac11*<sup>-/-</sup>*MPL*<sup>W515L</sup> were enriched and transplanted (3.75x10<sup>5</sup>, i.v.) into secondary recipient with support recipient whole bone marrow (5x10<sup>5</sup>, i.v.). **(d)** GFP expression in CD45.2 Lin<sup>-</sup>, LSK and committed progenitor populations was examined prior to secondary transplant.

## References:

1. Mazzacurati L, Lambert QT, Pradhan A, Griner LN, Huszar D, Reuther GW. The PIM inhibitor AZD1208 synergizes with ruxolitinib to induce apoptosis of ruxolitinib sensitive and resistant JAK2-V617F-driven cells and inhibit colony formation of primary MPN cells. *Oncotarget*. 2015;6(37):40141-40157.
2. Cox J, Neuhauser N, Michalski A, Scheltema RA, Olsen JV, Mann M. Andromeda: a peptide search engine integrated into the MaxQuant environment. *J Proteome Res*. 2011;10(4):1794-1805.
3. MacLean B, Tomazela DM, Shulman N, et al. Skyline: an open source document editor for creating and analyzing targeted proteomics experiments. *Bioinformatics*. 2010;26(7):966-968.
4. Mailloux AW, Zhang L, Moscinski L, et al. Fibrosis and subsequent cytopenias are associated with basic fibroblast growth factor-deficient pluripotent mesenchymal stromal cells in large granular lymphocyte leukemia. *J Immunol*. 2013;191(7):3578-3593.
